# Supplementary material for: Phase 2 study of lenvatinib in patients with advanced hepatocellular carcinoma
Source: PubMed Central journal article supplement (PMC5357473; doi:10.1007/s00535-016-1263-4), 2016-10-04
Supplement: 535_2016_1263_MOESM2_ESM.pdf [file 535_2016_1263_MOESM2_ESM.pdf]

**Phase 2 Study of Lenvatinib in Patients With Advanced Hepatocellular Carcinoma**

Kenji Ikeda, MD,<sup>1</sup> Masatoshi Kudo, MD,<sup>2</sup> Seiji Kawazoe, PhD,<sup>3</sup> Yukio Osaki, MD,<sup>4</sup> Masafumi Ikeda, MD,<sup>5</sup> Takuji Okusaka, MD,<sup>6</sup> Toshiyuki Tamai, MSc,<sup>7</sup> Takuya Suzuki, MSc,<sup>7</sup> Takashi Hisai, MSc,<sup>7</sup> Seiichi Hayato, MSc,<sup>7</sup> Kiwamu Okita, MD,<sup>8</sup> Hiromitsu Kumada, MD<sup>1</sup>

<sup>1</sup>*Department of Hepatology, Toranomon Hospital, Tokyo, Japan;* <sup>2</sup>*Department of Gastroenterology and Hepatology, Kinki University School of Medicine, Osaka, Japan;* <sup>3</sup>*Department of Hepatobiliary and Pancreatology, Saga-Ken Medical Centre KOSEIKAN, Saga, Japan;* <sup>4</sup>*Department of Gastroenterology and Hepatology, Osaka Red Cross Hospital, Osaka, Japan;* <sup>5</sup>*Department of Hepatobiliary and Pancreatic Oncology, National Cancer Center Hospital East, Kashiwa, Japan;* <sup>6</sup>*Department of Hepatobiliary and Pancreatic Oncology, National Cancer Center Hospital, Tokyo, Japan;* <sup>7</sup>*Eisai Co., Ltd., Tokyo, Japan;* <sup>8</sup>*Shunan Memorial Hospital, Yamaguchi, Japan.*

**Corresponding author:**

Kenji Ikeda, MD

Department of Hepatology, Toranomon Hospital

Toranomon 2-2-2, Minato-ku, Tokyo 105-8470, Japan

Email: [ikedakenji@tora.email.ne.jp](mailto:ikedakenji@tora.email.ne.jp)

Telephone: +81-3-3588-1111

Fax: +81-3-3582-7068

**Online Resource Table S2: Efficacy by Subgroups of Interest**

| Subgroup                               |       | n  | Median, months (95% CI) |                      |
|----------------------------------------|-------|----|-------------------------|----------------------|
|                                        |       |    | TTP <sup>a</sup>        | OS                   |
| EHS/portal vein invasion               | No    | 22 | 7.4<br>(5.5, 12.8)      | 17.5<br>(8.8, 23.4)  |
|                                        | Yes   | 24 | 7.4<br>(3.7, 9.4)       | 21.5<br>(9.8, NE)    |
| Hepatitis virus type <sup>b</sup>      | HBV   | 15 | 9.4<br>(7.2, 14.8)      | 22.4<br>(13.9, 30.5) |
|                                        | HCV   | 27 | 5.6<br>(5.5, 9.2)       | 16.2<br>(9.8, 28.6)  |
| Previous chemotherapy                  | No    | 30 | 5.5<br>(5.4, 13.1)      | 20.4<br>(9.8, 30.5)  |
|                                        | Yes   | 16 | 7.6<br>(5.6, 11.1)      | 17.8<br>(11.8, 28.6) |
| Alpha-fetoprotein (ng/mL) <sup>c</sup> | < 200 | 27 | 7.4<br>(5.5, 11.1)      | 23.4<br>(13.9, NA)   |
|                                        | ≥ 200 | 18 | 7.4<br>(3.7, 14.0)      | 13.3<br>(5.7, 25.1)  |

<sup>a</sup>Per independent reviewer assessment according to mRECIST

<sup>b</sup>Four patients did not have HBV or HCV

<sup>c</sup>One patient missed AFP sampling at baseline.

CI, confidence interval; EHS, extrahepatic spread; HBV, hepatitis B virus; HCV, hepatitis C virus;

OS, overall survival; TTP, time to progression.
