# Supplementary material for: Phase 2 study of lenvatinib in patients with advanced hepatocellular carcinoma
Source: Springer Nature journal article supplement (doi:10.1007/s00535-016-1263-4), 2016-10-04
Supplement: MOESM1 [file 10810900]

**Phase 2 Study of Lenvatinib in Patients With Advanced Hepatocellular Carcinoma**

Kenji Ikeda, MD,<sup>1</sup> Masatoshi Kudo, MD,<sup>2</sup> Seiji Kawazoe, PhD,<sup>3</sup> Yukio Osaki, MD,<sup>4</sup> Masafumi Ikeda, MD,<sup>5</sup> Takuji Okusaka, MD,<sup>6</sup> Toshiyuki Tamai, MSc,<sup>7</sup> Takuya Suzuki, MSc,<sup>7</sup> Takashi Hisai, MSc,<sup>7</sup> Seiichi Hayato, MSc,<sup>7</sup> Kiwamu Okita, MD,<sup>8</sup> Hiromitsu Kumada, MD<sup>1</sup>

<sup>1</sup>*Department of Hepatology, Toranomon Hospital, Tokyo, Japan;* <sup>2</sup>*Department of Gastroenterology and Hepatology, Kinki University School of Medicine, Osaka, Japan;* <sup>3</sup>*Department of Hepatobiliary and Pancreatology, Saga-Ken Medical Centre KOSEIKAN, Saga, Japan;* <sup>4</sup>*Department of Gastroenterology and Hepatology, Osaka Red Cross Hospital, Osaka, Japan;* <sup>5</sup>*Department of Hepatobiliary and Pancreatic Oncology, National Cancer Center Hospital East, Kashiwa, Japan;* <sup>6</sup>*Department of Hepatobiliary and Pancreatic Oncology, National Cancer Center Hospital, Tokyo, Japan;* <sup>7</sup>*Eisai Co., Ltd., Tokyo, Japan;* <sup>8</sup>*Shunan Memorial Hospital, Yamaguchi, Japan.*

**Corresponding author:**

Kenji Ikeda, MD

Department of Hepatology, Toranomon Hospital

Toranomon 2-2-2, Minato-ku, Tokyo 105-8470, Japan

Email: [ikedakenji@tora.email.ne.jp](mailto:ikedakenji@tora.email.ne.jp)

Telephone: +81-3-3588-1111

Fax: +81-3-3582-7068

**Online Resource Table S1: Dose Reduction Guidelines**

| Drug-related AE Grades                                                                                             |                                                                | Dose Delay                                                 | Dose Reduction to Restart          |
|--------------------------------------------------------------------------------------------------------------------|----------------------------------------------------------------|------------------------------------------------------------|------------------------------------|
| <b>HEMATOLOGIC TOXICITIES</b>                                                                                      |                                                                |                                                            |                                    |
| Grade 4                                                                                                            |                                                                | Delay until ≤                                              | Decrease 1 dose level <sup>a</sup> |
| Grade 3 thrombocytopenia that requires blood transfusion                                                           |                                                                | Grade 2                                                    |                                    |
| <b>NONHEMATOLOGIC TOXICITIES</b>                                                                                   |                                                                |                                                            |                                    |
| AST/ALT > 10.0 x ULN                                                                                               |                                                                | Delay until ≤<br>Grade 1 or<br>baseline Grade <sup>b</sup> | Decrease 1 dose level <sup>a</sup> |
| Proteinuria                                                                                                        | 4+ in dipstick                                                 |                                                            |                                    |
|                                                                                                                    | If monitored 3+ proteinuria but not judged grade 3 in dipstick |                                                            |                                    |
| Hypertension:<br>Grade 4 that is uncontrollable despite more intensive therapy than previously                     |                                                                |                                                            |                                    |
| Diarrhea/vomiting/nausea:<br>Grade 3 or higher that is uncontrollable despite maximal supportive therapies         |                                                                |                                                            |                                    |
| Any grade 3–4 nonhematologic toxicity other than above except for abnormal clinical laboratory values that require |                                                                |                                                            |                                    |

|              |  |  |
|--------------|--|--|
| no treatment |  |  |
|--------------|--|--|

<sup>a</sup>Reduction of lenvatinib dose: 12 mg → 8 mg → 4 mg → discontinue treatment.

<sup>b</sup>Baseline grade is defined as the data from the baseline period.

ALT, alanine aminotransferase; AST, aspartate aminotransferase; ULN, upper limit of normal.

---
